# Supplementary material for: High performance all-solid-state dye-sensitized solar cells based on cyanobiphenyl-functionalized imidazolium-type ionic crystals
Source: Royal Society of Chemistry journal article supplement (doi:10.1039/c2jm31551c), 2012-01-01
Supplement: c2jm31551c.pdf [file c2jm31551c.pdf]

Supplementary Material (ESI) for Journal of Materials Chemistry

This journal is © The Royal Society of Chemistry 2007

# **High Performance All-Solid-State Dye-Sensitized Solar Cells Based on Cyanobiphenyl-Functionalized Imidazolium-Type Ionic Crystals**

Huizi Caocen, Jie Zhao, Lihua Qiu, Dan Xu, Qing Li, Xiaojian Chen, Feng Yan\*

Jiangsu Key Laboratory of Advanced Functional Polymer Design and Application, Department of  
Polymer Science and Engineering, College of Chemistry, Chemical Engineering and Materials Science,  
Soochow University, Suzhou, 215123, China.

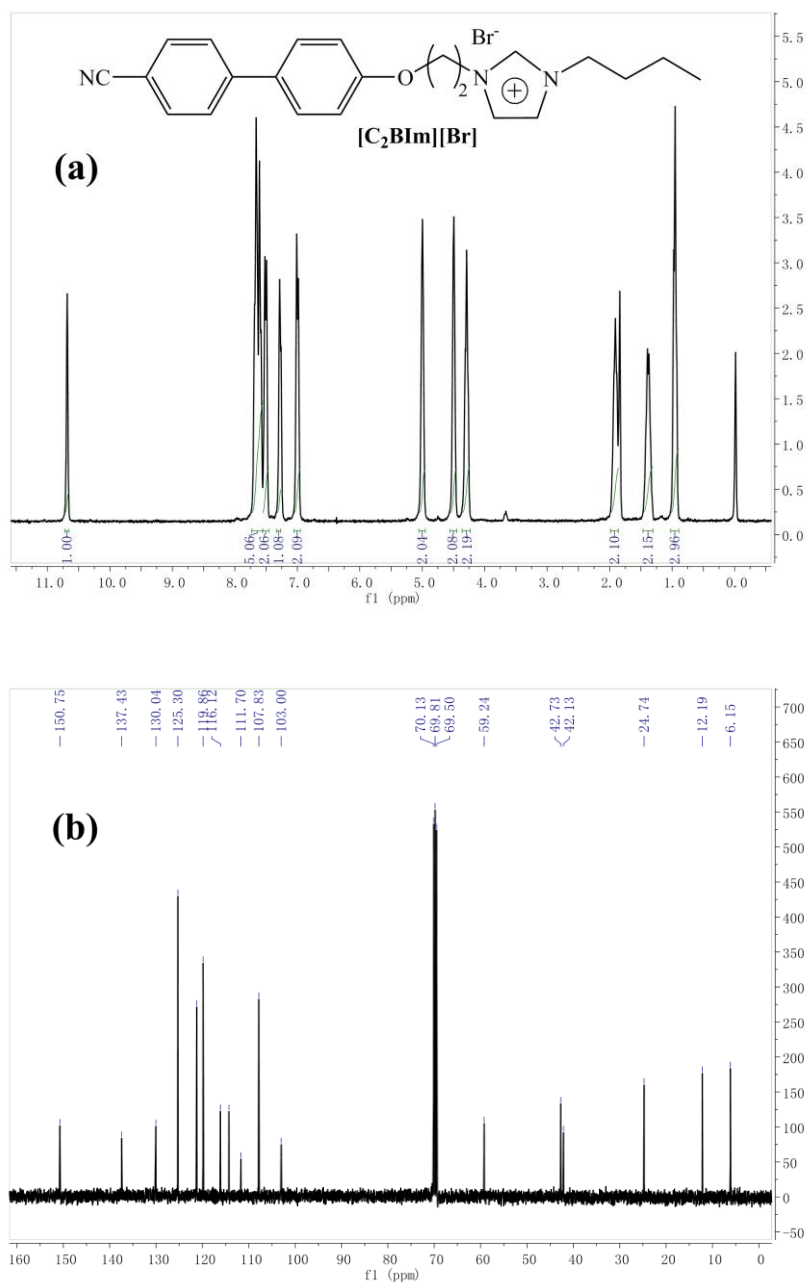

**Figure S1.** Full (a)  $^1\text{H}$ - and (b)  $^{13}\text{C}$ -NMR spectra for  $[\text{C}_2\text{BIm}][\text{Br}]$ .

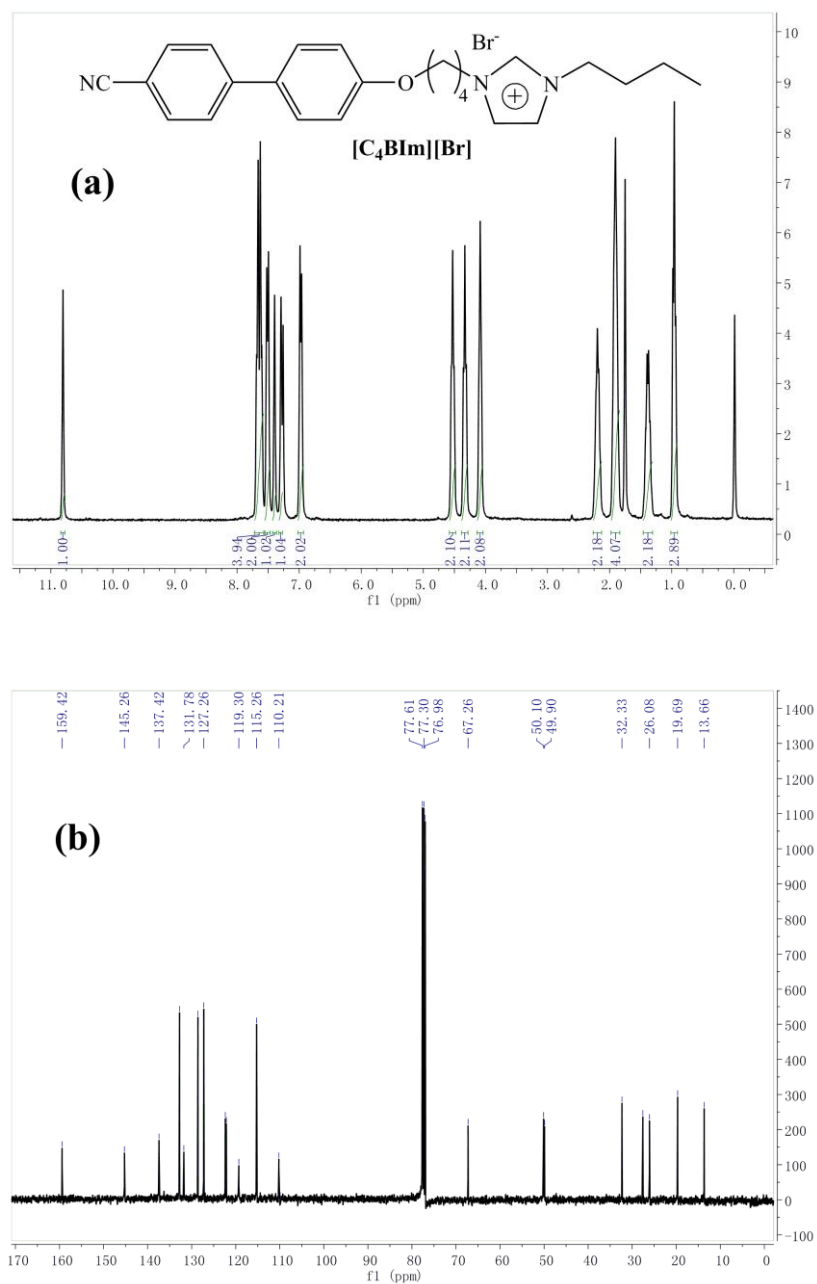

**Figure S2.** Full (a)  $^1\text{H}$ - and (b)  $^{13}\text{C}$ -NMR spectra for  $[\text{C}_4\text{BIm}][\text{Br}]$ .

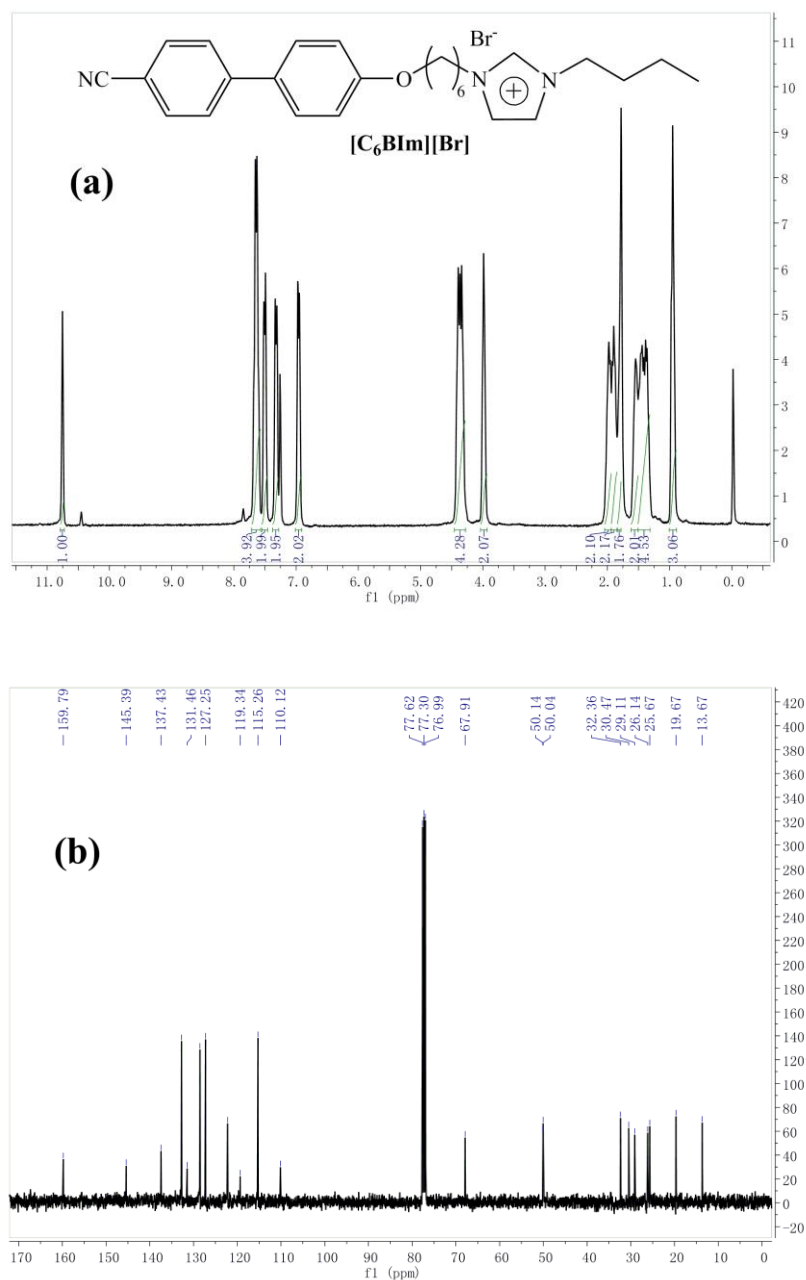

**Figure S3.** Full (a)  $^1\text{H}$ - and (b)  $^{13}\text{C}$ -NMR spectra for  $[\text{C}_6\text{BIm}][\text{Br}]$ .

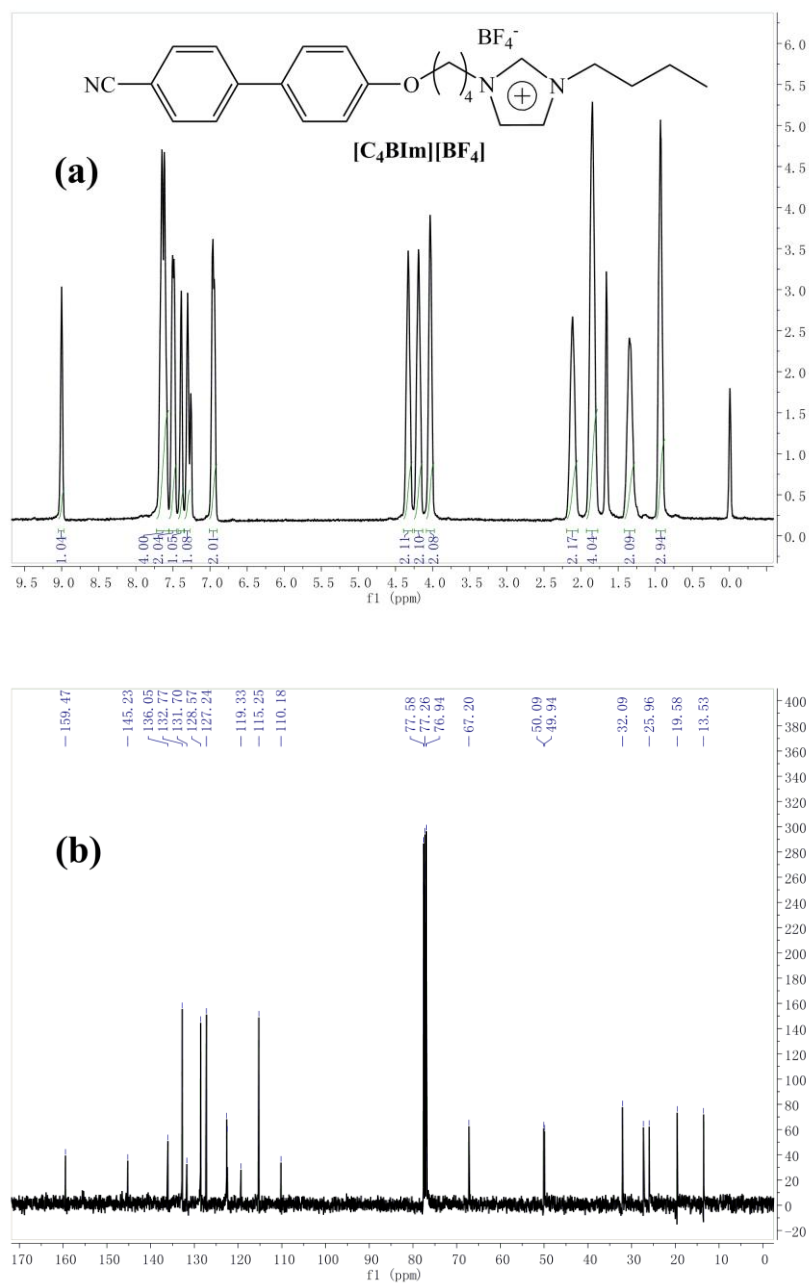

**Figure S4.** Full (a)  $^1\text{H}$ - and (b)  $^{13}\text{C}$ -NMR spectra for  $[\text{C}_4\text{BIm}][\text{BF}_4]$ .

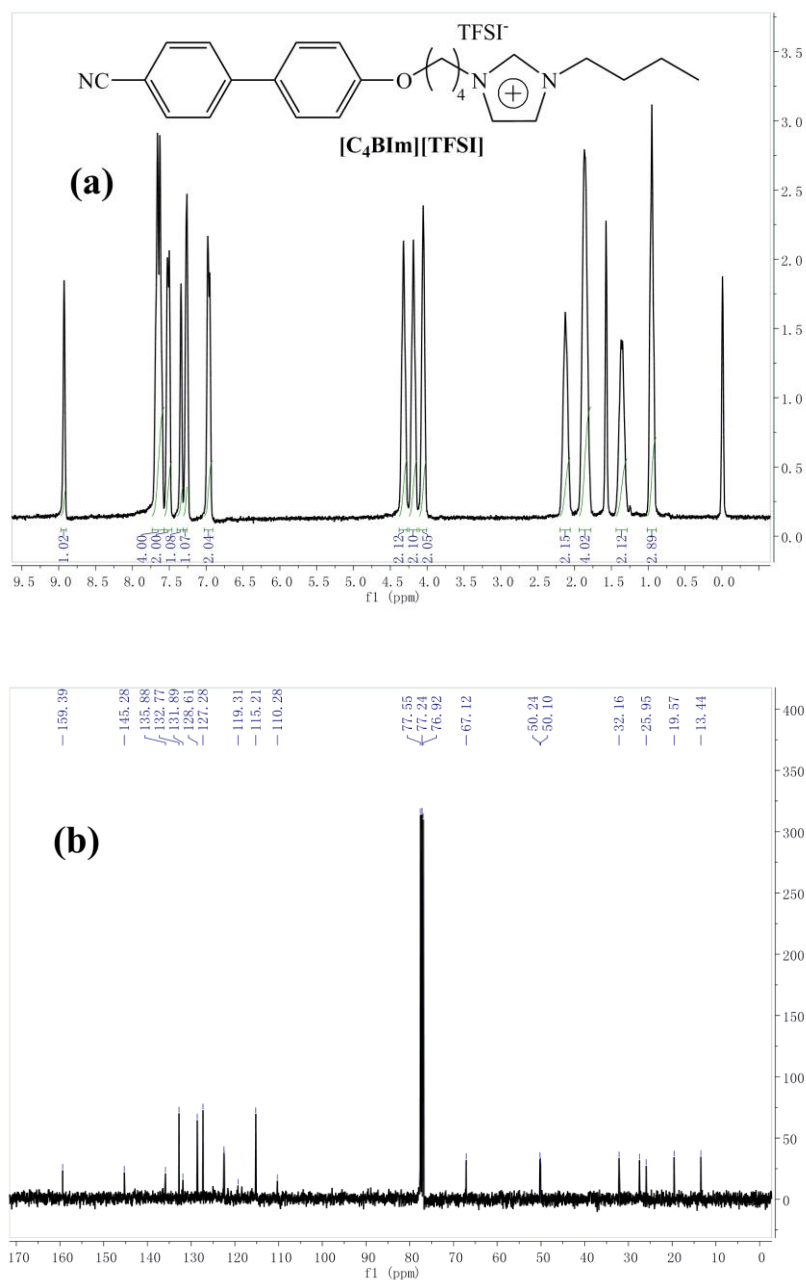

**Figure S5.** Full (a)  $^1H$ - and (b)  $^{13}C$ -NMR spectra for  $[C_4BIm][TFSI]$ .

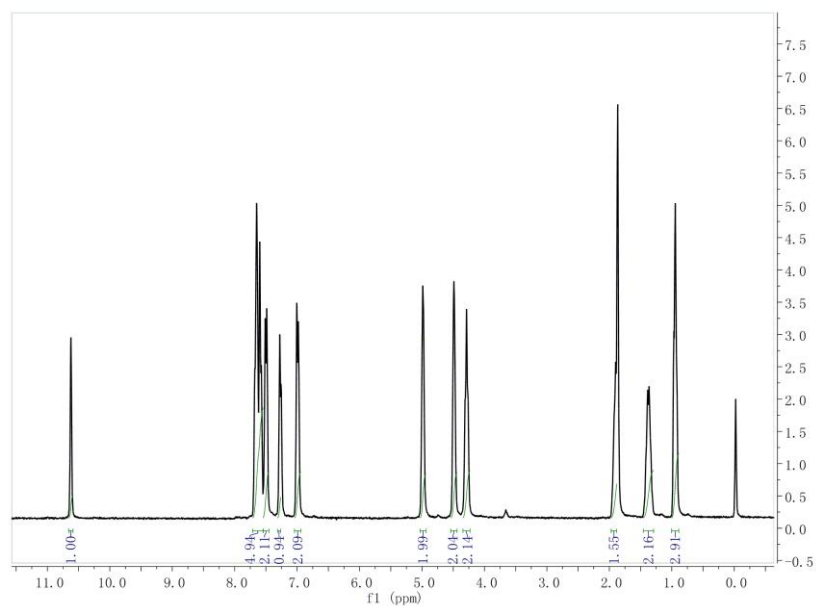

**Figure S6.** Full  $^1\text{H}$ -NMR spectra for  $[\text{C}_2\text{BIm}][\text{Br}]$  after be heated at  $150\text{ }^\circ\text{C}$  for 0.5 h under a  $\text{N}_2$  atmosphere.

**Table S1.** Device performances of DSSCs with different electrolytes at 55 °C under different sun light intensity illumination.

| Device | Electrolytes <sup>[a]</sup>                                 | J <sub>sc</sub><br>[mA/cm <sup>2</sup> ] | V <sub>oc</sub><br>[V] | FF    | PCE<br>[%] | Light<br>Intensity<br>[mW/cm <sup>2</sup> ] |
|--------|-------------------------------------------------------------|------------------------------------------|------------------------|-------|------------|---------------------------------------------|
| I      | EMII/I <sub>2</sub>                                         | 10.89                                    | 0.575                  | 0.626 | 3.92       | 100                                         |
|        |                                                             | 6.35                                     | 0.557                  | 0.690 | 4.88       | 50                                          |
|        |                                                             | 1.69                                     | 0.527                  | 0.717 | 4.26       | 15                                          |
| II     | EMII/I <sub>2</sub> /[C <sub>2</sub> BIm][Br]               | 13.88                                    | 0.536                  | 0.581 | 4.33       | 100                                         |
|        |                                                             | 8.20                                     | 0.502                  | 0.623 | 5.13       | 50                                          |
|        |                                                             | 2.08                                     | 0.467                  | 0.681 | 4.41       | 15                                          |
| III    | EMII/I <sub>2</sub> /[C <sub>4</sub> BIm][Br]               | 14.57                                    | 0.568                  | 0.617 | 5.11       | 100                                         |
|        |                                                             | 8.52                                     | 0.554                  | 0.679 | 6.41       | 50                                          |
|        |                                                             | 2.22                                     | 0.522                  | 0.711 | 5.49       | 15                                          |
| IV     | EMII/I <sub>2</sub> /[C <sub>6</sub> BIm][Br]               | 14.41                                    | 0.561                  | 0.614 | 4.96       | 100                                         |
|        |                                                             | 8.45                                     | 0.546                  | 0.668 | 6.16       | 50                                          |
|        |                                                             | 2.20                                     | 0.519                  | 0.705 | 5.37       | 15                                          |
| V      | EMII/I <sub>2</sub> /[C <sub>4</sub> BIm][BF <sub>4</sub> ] | 14.33                                    | 0.542                  | 0.592 | 4.60       | 100                                         |
|        |                                                             | 8.39                                     | 0.534                  | 0.645 | 5.78       | 50                                          |
|        |                                                             | 2.18                                     | 0.495                  | 0.702 | 5.05       | 15                                          |
| VI     | EMII/I <sub>2</sub> /[C <sub>4</sub> BIm][TFSI]             | 14.08                                    | 0.540                  | 0.588 | 4.47       | 100                                         |
|        |                                                             | 8.27                                     | 0.522                  | 0.636 | 5.49       | 50                                          |
|        |                                                             | 2.10                                     | 0.489                  | 0.691 | 4.73       | 15                                          |

<sup>a</sup> 20 wt% [C<sub>n</sub>BIm][X] doped EMII electrolytes containing 0.1 M I<sub>2</sub>.
